# Supplementary material for: The Macrophage Migration Inhibitory Factor (MIF) Promoter Polymorphisms (rs3063368, rs755622) Predict Acute Kidney Injury and Death after Cardiac Surgery
Source: PubMed Central journal article supplement (PMC7565645; doi:10.3390/jcm9092936), 2020-09-11
Supplement: jcm-09-02936-s001.pdf [file jcm-09-02936-s001.pdf]

## SUPPLEMENATAL MATERIAL

Supplemental Figure 1. Flowchart of the patients screened and included in the study.

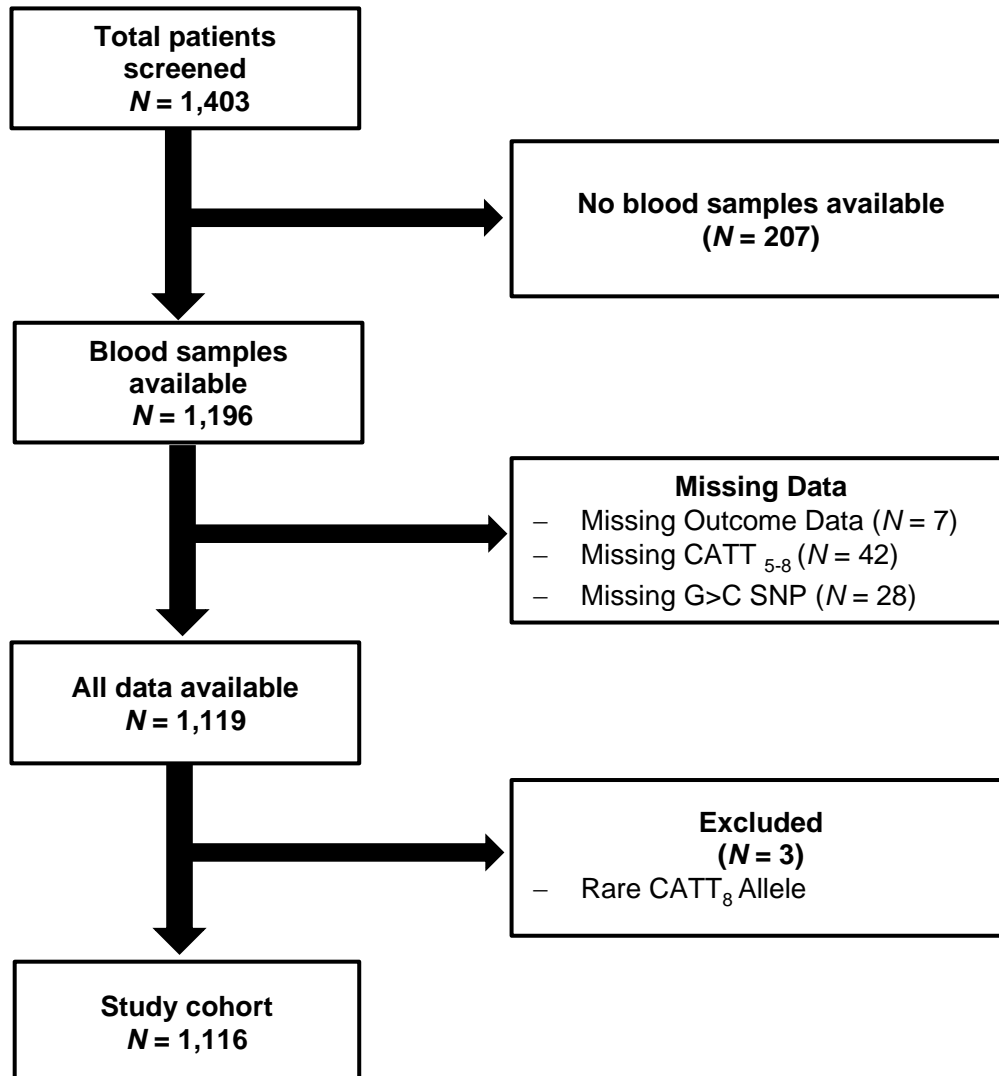

### Supplemental Figure 2. SNP rs5844572 region (CATT<sub>n</sub> tetranucleotide repeat) and rs755622 (G>C) with UCSC genome browser (Geb. 2009; GRCh37/hg19 Assembly)

#### UCSC Genome Browser on Human Feb. 2009 (GRCh37/hg19) Assembly

move <<< << < > >> >>> zoom in 1.5x 3x 10x base zoom out 1.5x 3x 10x 100x  
chr22:24,235,743-24,235,774 32 bp enter position, gene symbol, HGVS or search terms go

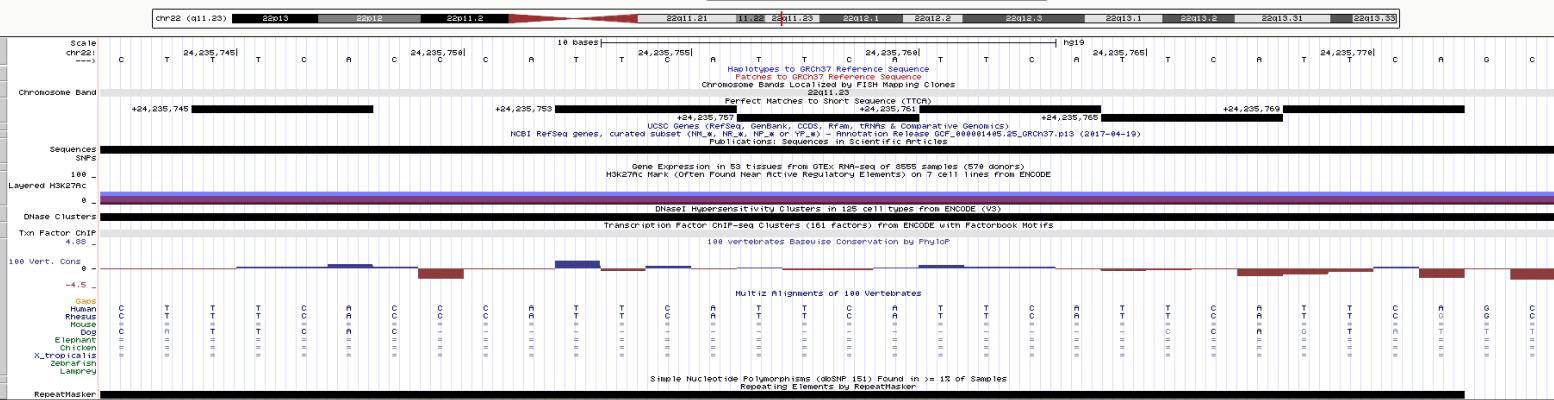

#### UCSC Genome Browser on Human Dec. 2013 (GRCh38/hg38) Assembly

move <<< << < > >> >>> zoom in 1.5x 3x 10x base zoom out 1.5x 3x 10x 100x  
chr22:23,893,556-23,893,587 32 bp chr22:23,893,550-23,893,588 go

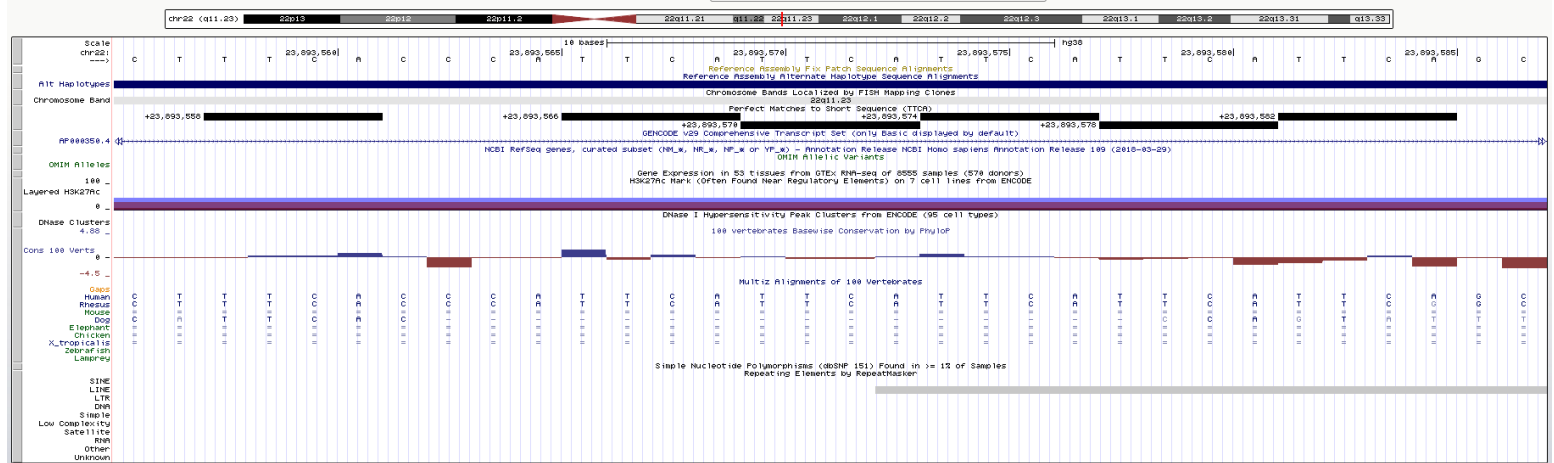

**Supplemental Table 1. Primer sequences used for genotyping of the tetranucleotide repeat polymorphism****CATT<sub>n</sub> (rs3063368)**

|              | <b>Forward primer</b> | <b>Backward primer</b> | <b>Annealing temperature</b> |
|--------------|-----------------------|------------------------|------------------------------|
| <b>Set 1</b> | ggtcgctatgaacgcacag   | cttaaccccagccttcagt    | 69 °C                        |
| <b>Set 2</b> | ggtaccctaggcagccaatc  | cacggaaagtcagagcttgg   | 70 °C                        |
| <b>Set 3</b> | gtatcgggatccctgccc    | tgctgcactttgaagatgg    | 69 °C                        |
| <b>Set 4</b> | gctacctccacacctgag    | tctccagccccagatct      | 65 °C                        |

| MIF<br>Polymorphism                                 | Myocardial infarction (N = 93)         |               |                                            |               |      |             | P-value |
|-----------------------------------------------------|----------------------------------------|---------------|--------------------------------------------|---------------|------|-------------|---------|
|                                                     | Patients carrying this allele/genotype |               | Patients NOT carrying this allele/genotype |               | OR   | (95% CI)    |         |
|                                                     | N                                      | Prevalence, % | N                                          | Prevalence, % |      |             |         |
| <b>CATT repeat allele carriers (rs3063368)</b>      |                                        |               |                                            |               |      |             |         |
| CATT <sub>5</sub>                                   | 40                                     | 8.20          | 53                                         | 8.44          | 0.97 | (0.61-1.52) | 0.9134  |
| CATT <sub>6</sub>                                   | 80                                     | 8.36          | 13                                         | 8.18          | 1.02 | (0.55-2.06) | 1.000   |
| CATT <sub>7</sub>                                   | 27                                     | 9.75          | 66                                         | 7.87          | 1.26 | (0.76-2.06) | 0.3184  |
| <b>Genotypes</b>                                    |                                        |               |                                            |               |      |             |         |
| G>C (rs755622)                                      |                                        |               |                                            |               |      |             |         |
| <b>GG</b>                                           | 61                                     | 8.01          | 32                                         | 9.04          | 0.88 | (0.55-1.42) | 0.562   |
| <b>GC</b>                                           | 30                                     | 9.15          | 63                                         | 7.99          | 1.16 | (0.71-1.86) | 0.553   |
| CC                                                  | 2                                      | 7.69          | 91                                         | 8.35          | 0.91 | (0.10-3.78) | 1.000   |
| CATT repeat (rs3063368)                             |                                        |               |                                            |               |      |             |         |
| CATT <sub>5,5</sub>                                 | 5                                      | 7.04          | 88                                         | 8.42          | 0.82 | (0.25-2.10) | 0.827   |
| CATT <sub>5,6</sub>                                 | 27                                     | 7.83          | 66                                         | 8.56          | 0.91 | (0.55-1.47) | 0.726   |
| CATT <sub>5,7</sub>                                 | 8                                      | 11.1          | 85                                         | 8.14          | 1.41 | (0.56-3.08) | 0.376   |
| CATT <sub>6,6</sub>                                 | 34                                     | 8.04          | 59                                         | 8.51          | 0.94 | (0.59-1.49) | 0.824   |
| CATT <sub>6,7</sub>                                 | 19                                     | 10.05         | 74                                         | 7.98          | 1.29 | (0.71-2.22) | 0.385   |
| CATT <sub>7,7</sub>                                 | 0                                      | 0.00          | 93                                         | 8.45          | 0.00 | (0.00-2.27) | 0.388   |
| <b>Individual genotype combinations<sup>#</sup></b> |                                        |               |                                            |               |      |             |         |
| CATT <sub>5,5</sub> -GG (6.1%)                      | 5                                      | 7.35          | 88                                         | 8.40          | 0.87 | (0.26-2.21) | 1.000   |
| CATT <sub>5,6</sub> -GG (29.5%)                     | 25                                     | 7.60          | 68                                         | 8.64          | 0.87 | (0.52-1.43) | 0.635   |
| CATT <sub>6,6</sub> -GG (32.3%)                     | 31                                     | 8.61          | 62                                         | 8.20          | 1.05 | (0.65-1.69) | 0.817   |
| CATT <sub>6,6</sub> -CG (5.6%)                      | 3                                      | 4.76          | 90                                         | 8.55          | 0.54 | (0.11-1.69) | 0.477   |
| CATT <sub>5,7</sub> -CG (6.2%)                      | 8                                      | 11.59         | 85                                         | 8.12          | 1.48 | (0.59-3.25) | 0.3637  |
| CATT <sub>6,7</sub> -CG (15.8%)                     | 17                                     | 9.66          | 76                                         | 8.09          | 1.22 | (0.66-2.14) | 0.460   |

**Supplemental Table 2. Association of MIF promoter polymorphisms with Myocardial Infarction.** Association between two of the polymorphisms in the MIF gene and risk of postoperative myocardial infarction. CI, confidence interval; OR, odds ratio; SNP, Single nucleotide polymorphism; CATT<sub>7x</sub>, patients carrying at least one CATT<sub>7</sub> allele.

<sup>#</sup> genotypes with a frequency of > 5%. Data presented as absolute numbers and percentage. P value calculated by Fisher exact test; bold fonts indicate P-values < 0.05.

| MIF<br>Polymorphism                                 | Stroke (N = 24)                        |               |                                            |               |      |              | P-value |
|-----------------------------------------------------|----------------------------------------|---------------|--------------------------------------------|---------------|------|--------------|---------|
|                                                     | Patients carrying this allele/genotype |               | Patients NOT carrying this allele/genotype |               | OR   | (95% CI)     |         |
|                                                     | N                                      | Prevalence, % | N                                          | Prevalence, % |      |              |         |
| <b>CATT repeat allele carriers (rs3063368)</b>      |                                        |               |                                            |               |      |              |         |
| CATT <sub>5</sub>                                   | 7                                      | 1.43          | 17                                         | 2.71          | 0.52 | (0.18-1.34)  | 0.211   |
| CATT <sub>6</sub>                                   | 22                                     | 2.30          | 2                                          | 1.26          | 1.85 | (0.45-16.35) | 0.561   |
| CATT <sub>7</sub>                                   | 6                                      | 2.17          | 18                                         | 2.15          | 1.01 | (0.32-2.69)  | 1.000   |
| <b>Genotypes</b>                                    |                                        |               |                                            |               |      |              |         |
| G>C (rs755622)                                      |                                        |               |                                            |               |      |              |         |
| GG                                                  | 16                                     | 2.10          | 8                                          | 2.26          | 0.93 | (0.37-2.53)  | 0.828   |
| GC                                                  | 8                                      | 2.44          | 16                                         | 2.03          | 1.21 | (0.44-3.02)  | 0.655   |
| CC                                                  | 0                                      | 0.00          | 24                                         | 2.20          | 0.00 | (0.00-5.76)  | 1.000   |
| CATT repeat (rs3063368)                             |                                        |               |                                            |               |      |              |         |
| CATT <sub>5,5</sub>                                 | 1                                      | 1.41          | 23                                         | 2.20          | 0.63 | (0.02-4.03)  | 1.000   |
| CATT <sub>5,6</sub>                                 | 5                                      | 1.45          | 19                                         | 2.46          | 0.58 | (0.17-1.63)  | 0.373   |
| CATT <sub>5,7</sub>                                 | 1                                      | 1.39          | 23                                         | 2.20          | 0.63 | (0.01-3.97)  | 1.000   |
| CATT <sub>6,6</sub>                                 | 12                                     | 2.84          | 12                                         | 1.73          | 1.66 | (0.67-4.07)  | 0.287   |
| CATT <sub>6,7</sub>                                 | 5                                      | 2.65          | 19                                         | 2.05          | 1.30 | (0.37-3.66)  | 0.583   |
| CATT <sub>7,7</sub>                                 | 0                                      | 0.00          | 24                                         | 2.18          | 0.00 | (0.00-9.77)  | 1.000   |
| <b>Individual genotype combinations<sup>#</sup></b> |                                        |               |                                            |               |      |              |         |
| CATT <sub>5,5</sub> -GG (6.1%)                      | 1                                      | 1.47          | 23                                         | 2.19          | 0.67 | (0.02-4.23)  | 1.000   |
| CATT <sub>5,6</sub> -GG (29.5%)                     | 5                                      | 1.52          | 19                                         | 2.41          | 0.62 | (0.18-1.75)  | 0.497   |
| CATT <sub>6,6</sub> -GG (32.3%)                     | 10                                     | 2.78          | 14                                         | 1.85          | 1.51 | (0.60-3.71)  | 0.377   |
| CATT <sub>6,6</sub> -CG (5.6%)                      | 2                                      | 3.17          | 22                                         | 2.09          | 1.54 | (0.17-6.49)  | 0.642   |
| CATT <sub>5,7</sub> -CG (6.2%)                      | 1                                      | 1.45          | 23                                         | 2.20          | 0.65 | (0.02-4.16)  | 1.000   |
| CATT <sub>6,7</sub> -CG (15.8%)                     | 5                                      | 2.84          | 19                                         | 2.02          | 1.42 | (0.41-3.99)  | 0.568   |

**Supplemental Table 3. Association of MIF promoter polymorphisms with Stroke**

Association between two of the polymorphisms in the MIF gene and risk of postoperative stroke. CI, confidence interval; OR, odds ratio; SNP, Single nucleotide polymorphism; CATT<sub>7x</sub>, patients carrying at least one CATT<sub>7</sub> allele.

<sup>#</sup> genotypes with a frequency of > 5%. Data presented as absolute numbers and percentage. P value calculated by Fisher exact test; bold fonts indicate P-values < 0.05.

| MIF<br>Polymorphism                                 | Delir (N = 144)                           |               |                                               |               |      |             | P-value |
|-----------------------------------------------------|-------------------------------------------|---------------|-----------------------------------------------|---------------|------|-------------|---------|
|                                                     | Patients carrying this<br>allele/genotype |               | Patients NOT carrying this<br>allele/genotype |               | OR   | (95% CI)    |         |
|                                                     | N                                         | Prevalence, % | N                                             | Prevalence, % |      |             |         |
| <b>CATT repeat allele carriers (rs3063368)</b>      |                                           |               |                                               |               |      |             |         |
| CATT <sub>5</sub>                                   | 61                                        | 12.50         | 83                                            | 13.22         | 0.94 | (0.65-1.36) | 0.787   |
| CATT <sub>6</sub>                                   | 119                                       | 12.43         | 25                                            | 15.72         | 0.76 | (0.47-1.27) | 0.251   |
| CATT <sub>7</sub>                                   | 44                                        | 15.88         | 100                                           | 11.92         | 1.40 | (0.93-2.08) | 0.098   |
| <b>Genotypes</b>                                    |                                           |               |                                               |               |      |             |         |
| G>C (rs755622)                                      |                                           |               |                                               |               |      |             |         |
| GG                                                  | 92                                        | 12.07         | 52                                            | 14.69         | 0.80 | (0.55-1.18) | 0.250   |
| GC                                                  | 47                                        | 14.33         | 97                                            | 12.31         | 1.19 | (0.80-1.76) | 0.378   |
| CC                                                  | 5                                         | 19.23         | 139                                           | 12.75         | 1.63 | (0.47-4.53) | 0.367   |
| CATT repeat (rs3063368)                             |                                           |               |                                               |               |      |             |         |
| CATT <sub>5,5</sub>                                 | 12                                        | 16.90         | 132                                           | 12.63         | 1.41 | (0.67-2.73) | 0.277   |
| CATT <sub>5,6</sub>                                 | 38                                        | 11.01         | 106                                           | 13.75         | 0.78 | (0.51-1.17) | 0.246   |
| CATT <sub>5,7</sub>                                 | 11                                        | 15.28         | 133                                           | 12.74         | 1.24 | (0.57-2.45) | 0.584   |
| CATT <sub>6,6</sub>                                 | 50                                        | 11.82         | 94                                            | 13.56         | 0.85 | (0.58-1.25) | 0.409   |
| CATT <sub>6,7</sub>                                 | 31                                        | 16.40         | 113                                           | 12.19         | 1.41 | (0.89-2.21) | 0.122   |
| CATT <sub>7,7</sub>                                 | 2                                         | 12.5          | 142                                           | 12.91         | 0.96 | (0.11-4.27) | 1.00    |
| <b>Individual genotype combinations<sup>#</sup></b> |                                           |               |                                               |               |      |             |         |
| CATT <sub>5,5</sub> -GG (6.1%)                      | 12                                        | 17.65         | 132                                           | 12.60         | 1.49 | (0.71-2.90) | 0.260   |
| CATT <sub>5,6</sub> -GG (29.5%)                     | 36                                        | 10.94         | 108                                           | 13.72         | 0.77 | (0.50-1.17) | 0.240   |
| CATT <sub>6,6</sub> -GG (32.3%)                     | 43                                        | 11.94         | 101                                           | 13.36         | 0.88 | (0.59-1.30) | 0.567   |
| CATT <sub>6,6</sub> -CG (5.6%)                      | 7                                         | 11.11         | 137                                           | 13.01         | 0.84 | (0.31-1.89) | 0.847   |
| CATT <sub>5,7</sub> -CG (6.2%)                      | 11                                        | 15.94         | 133                                           | 12.70         | 1.30 | (0.60-2.59) | 0.457   |
| CATT <sub>6,7</sub> -CG (15.8%)                     | 27                                        | 15.34         | 117                                           | 12.45         | 1.27 | (0.78-2.03) | 0.323   |

**Supplemental Table 4. Association of MIF promoter polymorphisms with delir** Association between two of the polymorphisms in the MIF gene and risk of postoperative delir. CI, confidence interval; OR, odds ratio; SNP, Single nucleotide polymorphism; CATT<sub>7x</sub>, patients carrying at least one CATT<sub>7</sub> allele. <sup>#</sup> genotypes with a frequency of > 5%. Data presented as absolute numbers and percentage. P value calculated by Fisher exact test; bold fonts indicate P-values < 0.05.

| MIF Polymorphism                               | Atrial Fibrillation (N = 245)           |               |                                            |               |      |             | P-value |
|------------------------------------------------|-----------------------------------------|---------------|--------------------------------------------|---------------|------|-------------|---------|
|                                                | Patients carrying this allele/genotype  |               | Patients NOT carrying this allele/genotype |               | OR   | (95% CI)    |         |
|                                                | N                                       | Prevalence, % | N                                          | Prevalence, % |      |             |         |
| <b>CATT repeat allele carriers (rs3063368)</b> |                                         |               |                                            |               |      |             |         |
| CATT <sub>5</sub>                              | 104                                     | 21.31         | 139                                        | 22.13         | 0.95 | (0.71-1.28) | 0.770   |
| CATT <sub>6</sub>                              | 209                                     | 21.84         | 34                                         | 21.38         | 1.03 | (0.67-1.60) | 1.000   |
| CATT <sub>7</sub>                              | 56                                      | 20.22         | 187                                        | 22.29         | 0.88 | (0.62-1.25) | 0.502   |
| <b>Genotypes</b>                               | <b>Genotypes</b>                        |               |                                            |               |      |             |         |
| G>C (rs755622)                                 | G>C (rs755622)                          |               |                                            |               |      |             |         |
| GG                                             | 170                                     | 22.31         | 73                                         | 20.62         | 1.11 | (0.80-1.53) | 0.586   |
| GC                                             | 69                                      | 21.04         | 174                                        | 22.08         | 0.94 | (0.68-1.30) | 0.750   |
| CC                                             | 4                                       | 15.38         | 239                                        | 21.93         | 0.65 | (0.16-1.93) | 0.630   |
| <b>CATT repeat (rs3063368)</b>                 | <b>CATT repeat (rs3063368)</b>          |               |                                            |               |      |             |         |
| CATT <sub>5,5</sub>                            | 14                                      | 19.72         | 229                                        | 21.91         | 0.88 | (0.44-1.63) | 0.767   |
| CATT <sub>5,6</sub>                            | 73                                      | 21.16         | 170                                        | 22.05         | 0.95 | (0.69-1.30) | 0.754   |
| CATT <sub>5,7</sub>                            | 17                                      | 23.61         | 226                                        | 21.65         | 1.12 | (0.60-2.00) | 0.660   |
| CATT <sub>6,6</sub>                            | 100                                     | 23.64         | 143                                        | 20.63         | 1.19 | (0.88-1.61) | 0.122   |
| CATT <sub>6,7</sub>                            | 36                                      | 19.05         | 207                                        | 22.33         | 0.82 | (0.54-1.23) | 0.335   |
| CATT <sub>7,7</sub>                            | 3                                       | 18.75         | 240                                        | 21.82         | 0.83 | (0-15-3.04) | 1.000   |
| <b>Individual genotype combinations</b>        | <b>Individual genotype combinations</b> |               |                                            |               |      |             |         |
| #                                              | #                                       |               |                                            |               |      |             |         |
| CATT <sub>5,5</sub> -GG (6.1%)                 | 13                                      | 19.12         | 230                                        | 21.95         | 0.84 | (0.41-1.59) | 0.652   |
| CATT <sub>5,6</sub> -GG (29.5%)                | 72                                      | 21.88         | 171                                        | 21.73         | 1.01 | (0.73-1.39) | 1.000   |
| CATT <sub>6,6</sub> -GG (32.3%)                | 84                                      | 23.33         | 159                                        | 21.03         | 1.14 | (0.83-1.56) | 0.394   |
| CATT <sub>6,6</sub> -CG (5.6%)                 | 16                                      | 25.40         | 227                                        | 21.56         | 1.24 | (0.64-2.27) | 0.529   |
| CATT <sub>5,7</sub> -CG (6.2%)                 | 16                                      | 23.19         | 227                                        | 21.68         | 1.09 | (0.57-1.98) | 0.764   |
| CATT <sub>6,7</sub> -CG (15.8%)                | 35                                      | 19.89         | 208                                        | 22.13         | 0.87 | (0.57-1.32) | 0.551   |

**Supplemental Table 5. Association of MIF regulatory polymorphisms with atrial fibrillation.** Association between two of the polymorphisms in the *MIF* gene and risk of postoperative atrial fibrillation. CI, confidence interval; OR, odds ratio; SNP, Single nucleotide polymorphism; CATT<sub>7x</sub>, patients carrying at least one CATT<sub>7</sub> allele. # genotypes with a frequency of > 5%. Data presented as absolute numbers and percentage. P value calculated by Fisher exact test; bold fonts indicate P-values < 0.05.

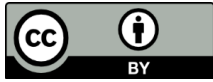

© 2020 by the authors. Licensee MDPI, Basel, Switzerland. This article is an open access article distributed under the terms and conditions of the Creative Commons Attribution (CC BY) license (<http://creativecommons.org/licenses/by/4.0/>).
